# Supplementary material for: Transcriptomic Analysis of Staphylococcus aureus Under the Stress Condition Caused by Litsea cubeba L. Essential Oil via RNA Sequencing
Source: Front Microbiol. 2020 Sep 8;11:1693. doi: 10.3389/fmicb.2020.01693 (PMC7509438; doi:10.3389/fmicb.2020.01693)
Supplement: Supplementary file 2 [file Table_1.XLSX]

## Sheet: UP
GeneID	Readcount_O_S29	Readcount_S29	log2FoldChange	pval	Gene name
SAOUHSC_02866	939.62	18.7819	5.25506	1.26257e-185	hypothetical protein
SAOUHSC_00389	0.862511	0	4.72663	0.00258247	superantigen-like protein
SAOUHSC_03015	23.1649	1.50534	3.52596	1.88038e-19	ATP phosphoribosyltransferase regulatory subunit
SAOUHSC_01687	0.777881	0.0846292	2.53918	0.0271607	hypothetical protein
SAOUHSC_00034	6.76808	0.885314	2.5282	3.39896e-09	hypothetical protein
SAOUHSC_03014	4.31737	0.546797	2.50269	5.4418e-06	ATP phosphoribosyltransferase catalytic subunit
SAOUHSC_00193	2.60375	0.411744	2.24467	0.000326449	hypothetical protein
SAOUHSC_03013	17.4256	2.99446	2.16152	1.83144e-15	histidinol dehydrogenase
SAOUHSC_02867	212.681	37.6813	2.12376	1.18267e-70	hypothetical protein
SAOUHSC_03011	5.87313	1.03177	2.07567	4.37366e-07	imidazoleglycerol-phosphate dehydratase
SAOUHSC_A02635	1.3637	0.242486	2.02221	0.0157021	hypothetical protein
SAOUHSC_01114	152.273	29.0185	2.01464	1.18692e-41	fibrinogen-binding protein
SAOUHSC_00537	2.58753	0.47357	1.96507	0.00287056
SAOUHSC_00420	57.2899	11.7305	1.92517	2.4768e-08
SAOUHSC_01110	646.493	135.015	1.88288	1.38102e-36
SAOUHSC_00194	103.537	21.9263	1.87108	8.64487e-39
SAOUHSC_02830	235.142	50.5462	1.84637	1.2794e-34
SAOUHSC_02641	12.586	2.848	1.76531	1.28693e-08
SAOUHSC_02708	807.229	185.184	1.75044	7.82774e-26
SAOUHSC_00961	1.47113	0.315713	1.72318	0.0230015
SAOUHSC_01712	155.508	37.6129	1.67319	7.70294e-33
SAOUHSC_01500	2.09116	0.507775	1.67073	0.00610308
SAOUHSC_03012	13.1472	3.21414	1.64956	9.41424e-09
SAOUHSC_02709	484.359	120.203	1.64073	3.03707e-31
SAOUHSC_01319	794.569	203.987	1.58208	1.00438e-30
SAOUHSC_02802	4.36779	1.1164	1.55443	0.000225477
SAOUHSC_02814	85.5396	23.1142	1.50925	1.02624e-27
SAOUHSC_01115	88.9243	24.3656	1.48897	7.84338e-15
SAOUHSC_00330	39.6	10.8711	1.47164	7.85342e-16
SAOUHSC_01311	13.4467	3.78374	1.44731	1.43461e-08
SAOUHSC_00195	1170.05	331.179	1.44651	2.18879e-27
SAOUHSC_02266	3.73155	1.03177	1.42466	0.00942445
SAOUHSC_01134	4.20994	1.20103	1.40542	0.000801087
SAOUHSC_00637	1827.73	537.735	1.39287	7.95338e-18
SAOUHSC_02688	1.69082	0.484972	1.37931	0.0376975
SAOUHSC_A02254	3.8324	1.162	1.36415	0.00649955
SAOUHSC_01180	25.8454	7.88978	1.34523	1.22745e-10
SAOUHSC_00033	34.4201	10.3813	1.34503	5.55804e-14
SAOUHSC_01399	80.3892	24.6261	1.33148	5.04092e-24
SAOUHSC_02710	545.95	167.729	1.33108	1.20429e-18
SAOUHSC_00213	39.3689	12.1291	1.31207	5.402e-13
SAOUHSC_00816	2.87386	0.896716	1.30839	0.0110014
SAOUHSC_01711	197.226	61.6185	1.29258	1.57563e-21
SAOUHSC_T0005	26.1041	8.21031	1.29003	3.53863e-11
SAOUHSC_00544	175.918	55.5665	1.28391	4.59398e-30
SAOUHSC_00822	26.5975	8.28836	1.28385	1.4856e-09
SAOUHSC_01710	47.6064	15.366	1.25144	1.38191e-09
SAOUHSC_01316	4.00166	1.30846	1.23506	0.00726388
SAOUHSC_00646	121.152	39.7707	1.22559	1.82021e-23
SAOUHSC_00981	4.93739	1.58997	1.21847	0.00220218
SAOUHSC_03017	7.99673	2.67875	1.20881	0.000161229
SAOUHSC_02937	67.4682	22.3916	1.20719	1.06634e-16
SAOUHSC_A02503	2.19201	0.704654	1.20666	0.0419666
Novel00002	1054.41	349.853	1.20484	2.07298e-11
SAOUHSC_02865	2.4573	0.812086	1.20315	0.0241065
SAOUHSC_01921	2.41169	0.812086	1.19612	0.0430939
SAOUHSC_02898	5.95599	2.02452	1.1902	0.00146683
SAOUHSC_02151	124.951	43.2554	1.16388	1.748e-11
SAOUHSC_00328	21.1001	7.24037	1.1616	1.64622e-07
SAOUHSC_00251	7.51834	2.54851	1.1577	0.00025279
SAOUHSC_00717	816.43	282.807	1.15657	9.45414e-16
SAOUHSC_01411	16.2425	5.55919	1.14691	6.41164e-06
SAOUHSC_02868	9.22538	3.21414	1.13848	0.000288936
SAOUHSC_01833	420.742	147.287	1.13398	7.81771e-18
SAOUHSC_00957	81.8086	28.4388	1.12894	5.63134e-09
SAOUHSC_02794	13.3003	4.70326	1.12776	2.58176e-05
SAOUHSC_02750	121.872	42.9866	1.12741	9.51358e-14
SAOUHSC_02667	607.899	213.568	1.12494	2.191e-10
SAOUHSC_02163	66.6964	23.7198	1.12341	8.46906e-10
SAOUHSC_00661	23.0304	8.14849	1.11547	4.11023e-06
SAOUHSC_03045	5146.86	1833.55	1.10597	8.27751e-07
SAOUHSC_00531	208.55	74.604	1.10534	3.12859e-20
SAOUHSC_02153	78.2055	28.1577	1.104	7.58142e-15
SAOUHSC_00261	4.58266	1.65838	1.10354	0.00676102
SAOUHSC_00197	840.694	302.124	1.09948	2.40031e-17
SAOUHSC_02851	6.32872	2.32401	1.09596	0.0260107
SAOUHSC_A00992	3.64692	1.27425	1.0942	0.0129131
SAOUHSC_02950	22.5761	8.2397	1.09309	9.01434e-07
SAOUHSC_02832	5.43377	1.97409	1.09108	0.0066837
SAOUHSC_00714	789.563	290.252	1.07514	8.49776e-14
SAOUHSC_00753	3.07074	1.1164	1.07154	0.0435215
SAOUHSC_00206	8947.94	3285.21	1.0699	1.51895e-13
SAOUHSC_00715	463.287	170.991	1.06387	2.15091e-18
SAOUHSC_00253	70.2179	25.9166	1.06016	1.5064e-11
SAOUHSC_02897	4.402	1.65838	1.05101	0.0108774
SAOUHSC_00196	1314.89	490.142	1.04889	1.16446e-14
SAOUHSC_00405	8.43609	3.16372	1.04688	0.00129656
SAOUHSC_00323	5.24171	1.92848	1.04504	0.00555805
SAOUHSC_02696	62.7991	23.5211	1.04293	5.74991e-13
SAOUHSC_02100	18.8301	7.00928	1.04276	9.5501e-07
SAOUHSC_00976	7.54596	2.8366	1.04111	0.000635338
SAOUHSC_02118	12.9683	4.91813	1.03931	6.75069e-05
SAOUHSC_00636	1157.92	433.879	1.03745	2.35145e-14
SAOUHSC_00716	334.367	126.158	1.03539	9.26326e-18
SAOUHSC_00035	9.68273	3.58028	1.03231	0.000314366
SAOUHSC_02729	495.221	188.67	1.01821	1.66323e-13
SAOUHSC_00258	65.1297	24.8866	1.01624	1.12733e-12
SAOUHSC_00208	6.20025	2.34023	1.0158	0.0113431
SAOUHSC_02152	220.117	83.8005	1.01418	7.99754e-17
SAOUHSC_00401	120.51	45.9319	1.00613	8.90176e-13
SAOUHSC_00010	50.7131	19.2945	1.00216	5.59173e-08
SAOUHSC_01878	23.3737	9.00618	1.00101	1.20203e-06
SAOUHSC_00398	14.6526	5.73021	0.997964	0.000115013
SAOUHSC_02923	1573.01	608.319	0.992976	6.75735e-14
SAOUHSC_00132	2543.9	994.419	0.973997	1.67042e-11
SAOUHSC_01832	356.777	139.736	0.971646	3.03364e-16
SAOUHSC_00259	3.48248	1.38169	0.968948	0.0251354
SAOUHSC_02161	125.525	49.6771	0.9677	3.06228e-11
SAOUHSC_02595	23.8359	9.38372	0.96593	1.21197e-06
SAOUHSC_02390	775.483	306.115	0.962496	5.39136e-13
SAOUHSC_02384	28.5584	11.221	0.958879	2.50695e-07
SAOUHSC_00329	9.6095	3.81795	0.958037	0.000580159
SAOUHSC_03016	24.7681	9.77748	0.957937	8.68363e-06
SAOUHSC_02837	9.93003	3.9644	0.951836	0.000456447
SAOUHSC_00819	4577.28	1804.77	0.951568	0.000190247
SAOUHSC_02864	21.1782	8.4984	0.947595	1.46262e-05
SAOUHSC_00357	121.533	48.3568	0.942471	4.324e-09
SAOUHSC_02629	85.3805	34.1269	0.942316	3.39596e-14
SAOUHSC_01679	183.319	73.8411	0.93982	9.46409e-20
SAOUHSC_00997	487.51	195.69	0.939807	1.84781e-12
SAOUHSC_01917	4.41822	1.78203	0.93646	0.017413
SAOUHSC_01095	31.131	12.5751	0.931637	4.2946e-07
SAOUHSC_01852	712.207	287.621	0.930512	4.79256e-11
SAOUHSC_02226	77.7266	31.4889	0.930012	3.82771e-12
SAOUHSC_01899	201.591	81.1002	0.928977	9.2819e-07
SAOUHSC_03018	12.0344	4.84972	0.925261	0.000675858
SAOUHSC_01273	75.6828	30.9601	0.918958	3.5049e-11
SAOUHSC_01903	12.0374	4.90014	0.915907	0.000976306
SAOUHSC_02009	122.85	50.323	0.909746	8.62354e-10
SAOUHSC_00610	22.8023	9.42932	0.906851	1.07482e-05
SAOUHSC_01821	142.442	58.3899	0.903927	1.51283e-11
SAOUHSC_00335	34.7779	14.2317	0.901684	5.40771e-07
SAOUHSC_01220	21.6469	8.92637	0.89736	9.94962e-06
SAOUHSC_01596	25.5201	10.5619	0.89308	6.59771e-06
SAOUHSC_00937	340.468	141.783	0.890203	2.0771e-10
SAOUHSC_02784	17.0594	7.07111	0.887986	8.78531e-05
SAOUHSC_02599	28.5093	12.0234	0.881347	4.53277e-05
SAOUHSC_02281	2822.01	1188.35	0.879579	5.00894e-08
SAOUHSC_01902	35.515	15.0977	0.874809	9.11766e-06
SAOUHSC_02557	7.1294	3.01726	0.872908	0.00817851
SAOUHSC_02386	14.3939	6.02794	0.872448	0.000728492
SAOUHSC_02638	49.356	20.8262	0.871393	6.80558e-09
SAOUHSC_01326	635.797	268.368	0.867894	7.98804e-11
SAOUHSC_02611	171.33	72.1318	0.866818	3.61936e-13
SAOUHSC_00743	1036.43	438.58	0.866455	5.70656e-11
SAOUHSC_00965	84.6513	35.7169	0.86484	1.00391e-11
SAOUHSC_02911	10.9	4.68704	0.862774	0.00138926
SAOUHSC_02576	121.811	51.0399	0.858433	0.000618263
SAOUHSC_00545	490.761	208.726	0.857743	8.61637e-12
SAOUHSC_00773	7.03337	3.00586	0.856975	0.00718462
SAOUHSC_00569	1431.05	610.02	0.85324	9.68667e-11
SAOUHSC_01053	497.725	212.907	0.851032	1.82168e-11
SAOUHSC_02631	143.2	61.6256	0.844483	6.80712e-10
SAOUHSC_02154	126.989	54.4843	0.842198	1.04218e-10
SAOUHSC_02871	14.6249	6.29323	0.838996	0.000180381
SAOUHSC_02155	77.2224	33.3508	0.838755	3.40633e-09
SAOUHSC_01913	5.67625	2.43626	0.833633	0.0221486
SAOUHSC_02883	13.1604	5.62101	0.82515	0.0202244
SAOUHSC_00634	2198.13	954.947	0.824042	7.60882e-08
SAOUHSC_00173	425.131	185.127	0.823938	5.17714e-10
SAOUHSC_00281	189.741	82.7968	0.822702	1.25765e-06
SAOUHSC_01208	231.56	100.233	0.819496	7.1291e-06
SAOUHSC_01320	929.055	406.697	0.815958	1.36175e-10
SAOUHSC_00612	6.3125	2.76337	0.815683	0.0129349
SAOUHSC_01877	37.3589	16.45	0.813049	5.74648e-06
SAOUHSC_00433	19.686	8.67906	0.81123	0.000107467
SAOUHSC_02279	13.1814	5.78545	0.807315	0.00282122
SAOUHSC_02719	6.5598	2.85282	0.799163	0.033903
SAOUHSC_02813	44.7649	20.0207	0.796629	8.4143e-07
SAOUHSC_00172	32.6508	14.5035	0.795646	0.000114509
SAOUHSC_00863	54.8997	24.5595	0.792692	7.94849e-06
SAOUHSC_00660	126.103	55.9668	0.792188	4.09156e-11
SAOUHSC_00029	35.0414	15.9458	0.790804	0.0207446
SAOUHSC_02816	147.122	65.7202	0.790215	1.94473e-11
SAOUHSC_01895	477.269	212.814	0.789352	6.77371e-10
SAOUHSC_03021	26.6185	11.9274	0.788164	1.96602e-05
SAOUHSC_02731	335.122	150.009	0.78145	2.16917e-11
SAOUHSC_01073	20.192	9.07282	0.774609	0.00016512
SAOUHSC_00201	53.5918	24.0727	0.774502	5.5456e-06
SAOUHSC_01030	44.1624	20.1557	0.767666	9.17923e-05
SAOUHSC_00704	101.219	45.543	0.766245	6.12165e-07
SAOUHSC_02385	72.7454	32.9829	0.765649	7.88188e-08
SAOUHSC_00317	60.6869	27.4447	0.765275	2.49379e-08
SAOUHSC_02125	76.2056	34.4198	0.764802	8.12976e-08
SAOUHSC_00477	160.953	72.8496	0.764482	1.8522e-11
SAOUHSC_01394	94.2332	42.8354	0.762755	1.19195e-10
SAOUHSC_00555	5.84374	2.67875	0.762514	0.0268195
SAOUHSC_01709	220.209	99.7848	0.762123	1.88475e-07
SAOUHSC_03019	53.4243	24.3722	0.755199	6.47528e-07
SAOUHSC_00605	31.3897	14.3343	0.753509	0.000461965
SAOUHSC_02978	466.206	213.535	0.750116	1.56575e-09
SAOUHSC_02276	85.5655	39.3511	0.750046	1.40745e-08
SAOUHSC_00475	69.6303	32.0879	0.749317	1.67644e-06
SAOUHSC_00315	8.10416	3.72192	0.749122	0.0155847
SAOUHSC_02924	550.012	251.935	0.746707	1.34781e-08
SAOUHSC_01825	16.9568	7.78717	0.744161	0.0010152
SAOUHSC_00298	36.3696	16.7771	0.743715	5.09074e-06
SAOUHSC_01156	118.907	54.7838	0.741237	3.04678e-10
SAOUHSC_01084	8.06514	3.69911	0.737769	0.00940145
SAOUHSC_01322	763.641	352.847	0.737547	1.50643e-08
SAOUHSC_01400	75.6276	35.1166	0.737502	2.20657e-08
SAOUHSC_01136	110.368	50.9185	0.735948	3.24437e-05
SAOUHSC_01764	12.1839	5.6618	0.735534	0.0126297
SAOUHSC_02160	27.8862	12.8338	0.735185	4.36275e-05
SAOUHSC_01464	271.969	125.729	0.732419	5.97108e-09
SAOUHSC_00250	10.8333	4.93916	0.732411	0.0286012
SAOUHSC_00036	32.9862	15.327	0.730011	1.0818e-05
SAOUHSC_01072	27.5411	12.886	0.728009	6.86607e-05
SAOUHSC_00873	704.396	328.256	0.723967	7.0543e-08
SAOUHSC_01395	187.192	87.1203	0.722542	3.30211e-11
SAOUHSC_01634	562.629	262.726	0.719078	8.72623e-08
SAOUHSC_02608	30.6052	14.2659	0.71855	0.00190785
SAOUHSC_01063	289.595	135.691	0.716429	2.27314e-08
SAOUHSC_01927	9.42884	4.40377	0.708617	0.00882414
SAOUHSC_00607	116.828	54.9561	0.705168	3.73629e-08
SAOUHSC_02367	35.2839	16.7201	0.704276	0.000121464
SAOUHSC_00923	348.563	164.642	0.70105	2.40949e-08
SAOUHSC_02933	1185.36	563.073	0.696841	9.99403e-08
SAOUHSC_00807	21.4062	10.1046	0.694379	0.00127753
SAOUHSC_00202	8.01471	3.86355	0.69336	0.0318176
SAOUHSC_02247	84.6267	40.4561	0.692958	6.45041e-08
SAOUHSC_00198	948.326	453.715	0.688402	1.13254e-07
SAOUHSC_00412	126.01	60.4588	0.685312	1.27498e-06
SAOUHSC_00223	35.0906	16.9758	0.68307	0.000417005
SAOUHSC_03009	9.40604	4.5226	0.680739	0.0180089
SAOUHSC_02099	39.1019	18.7609	0.679495	5.68562e-05
SAOUHSC_00996	187.932	90.017	0.679272	1.81505e-09
SAOUHSC_02973	13.2498	6.35505	0.678194	0.00490324
SAOUHSC_00451	18.7437	9.0338	0.67819	0.00263775
SAOUHSC_02891	26.8382	13.0276	0.676607	0.000741412
SAOUHSC_02520	25.2482	12.2431	0.674244	0.000554218
SAOUHSC_02258	1250.47	603.444	0.672465	5.8079e-07
SAOUHSC_00464	39.8732	19.2458	0.672378	1.37785e-05
SAOUHSC_02011	53.4177	25.8271	0.671429	1.04016e-06
SAOUHSC_00007	42.4655	20.3947	0.670982	4.24542e-05
SAOUHSC_00606	181.484	87.6869	0.670736	2.27567e-10
SAOUHSC_00671	1392.02	670.481	0.670455	0.000235486
SAOUHSC_00692	300.794	146.165	0.669489	3.15388e-09
SAOUHSC_00989	552.138	267.974	0.669069	2.71917e-07
SAOUHSC_00540	22.2147	10.7816	0.666964	0.00106803
SAOUHSC_01396	193.495	93.788	0.666792	5.7241e-10
SAOUHSC_01058	87.8277	42.7459	0.665839	4.72356e-05
SAOUHSC_00648	303.567	147.768	0.663718	2.27663e-09
SAOUHSC_01274	35.1686	17.1433	0.661734	1.94471e-05
SAOUHSC_00395	10.9276	5.36889	0.660404	0.010153
SAOUHSC_02278	8.28482	4.00342	0.659125	0.0289462
SAOUHSC_01265	73.5075	35.5393	0.658031	4.48125e-05
SAOUHSC_02119	493.244	240.933	0.656661	6.15388e-07
SAOUHSC_01038	27.4564	13.4832	0.652735	0.000490375
SAOUHSC_02373	85.8865	41.8163	0.652711	9.92375e-07
SAOUHSC_00434	16.7143	8.1419	0.651571	0.00567014
SAOUHSC_00949	152.367	74.5339	0.65065	3.95965e-07
SAOUHSC_01704	9.59328	4.70326	0.648365	0.0197415
SAOUHSC_02843	120.946	59.4349	0.647197	3.01421e-07
SAOUHSC_02622	18.1158	8.89875	0.645986	0.00598993
SAOUHSC_02374	50.3176	24.9826	0.639722	1.7898e-05
SAOUHSC_01680	50.0343	24.9322	0.637192	5.17776e-05
SAOUHSC_01718	12.3987	6.21518	0.636972	0.0195449
SAOUHSC_02126	114.578	56.8425	0.636679	6.65511e-07
SAOUHSC_00700	27.1311	13.2437	0.636014	0.00379801
SAOUHSC_00466	220.64	109.654	0.634305	2.10196e-07
SAOUHSC_00564	23.3653	11.5937	0.632686	0.00253315
SAOUHSC_02797	17.0318	8.50981	0.629268	0.00361484
SAOUHSC_01845	596.959	296.63	0.628089	4.28381e-06
SAOUHSC_00683	79.0539	39.7418	0.6271	0.000662938
SAOUHSC_00691	101.008	50.4305	0.626017	4.42967e-07
SAOUHSC_00174	35.3234	17.5256	0.6257	0.000466165
SAOUHSC_00450	68.6561	34.3369	0.624951	1.0942e-06
SAOUHSC_02963	478.66	239.077	0.623966	1.1119e-06
SAOUHSC_00738	559.854	279.421	0.623527	2.22378e-06
SAOUHSC_02777	76.4866	38.5408	0.623498	1.15142e-05
SAOUHSC_00946	238.091	119.616	0.621528	1.55801e-08
SAOUHSC_00828	336.205	168.371	0.621469	5.62845e-07
SAOUHSC_01173	55.1356	27.7166	0.621436	0.000631428
SAOUHSC_01135	1246.26	626.225	0.620591	3.71182e-05
SAOUHSC_01966	152.809	76.772	0.619369	1.05983e-08
SAOUHSC_00012	64.5834	32.4085	0.617301	9.40563e-05
SAOUHSC_02619	17.3295	8.8093	0.616596	0.00446729
SAOUHSC_01264	612.331	308.395	0.610674	0.00156244
SAOUHSC_01397	138.172	69.4824	0.6103	3.25139e-07
SAOUHSC_00693	253.711	128.319	0.608797	1.20822e-07
SAOUHSC_00199	2226.34	1124.75	0.608529	7.99368e-06
SAOUHSC_02167	1038.84	526.707	0.605936	8.16323e-06
SAOUHSC_03025	28.4347	14.3343	0.60509	0.000913813
SAOUHSC_00694	2802.8	1415.85	0.604001	0.000464988
SAOUHSC_02928	145.324	74.2318	0.60204	0.00103891
SAOUHSC_01152	312.701	158.714	0.599589	1.74209e-07
SAOUHSC_01361	115.663	58.6666	0.599111	5.98443e-05
SAOUHSC_00991	43.0838	22.0386	0.598914	0.000970794
SAOUHSC_00967	18.7989	9.68321	0.597124	0.0150508
SAOUHSC_02990	709.74	361.658	0.596734	1.99689e-06
SAOUHSC_01440	12.3825	6.30463	0.595089	0.0106391
SAOUHSC_01354	173.356	88.292	0.591099	1.06503e-06
SAOUHSC_02943	12.7649	6.50151	0.590595	0.0139141
SAOUHSC_00771	75.4811	38.5991	0.590124	3.28251e-06
SAOUHSC_02149	118.562	60.9911	0.590015	1.34537e-05
SAOUHSC_00431	15.7755	7.98404	0.588826	0.0176729
SAOUHSC_00924	233.079	118.819	0.588133	3.99837e-06
SAOUHSC_02686	13.8357	7.16232	0.58659	0.0146412
SAOUHSC_00640	89.4202	46.1245	0.586083	0.000423055

## Sheet: DOWN
GeneID	Readcount_O_S29	Readcount_S29	log2FoldChange	pval	Gene name
SAOUHSC_00852	0	0.423146	-4.06934	0.0365951	hypothetical protein
SAOUHSC_01037	0.0732275	0.716056	-3.14998	0.0194902	hypothetical protein
SAOUHSC_00233	89.7589	584.346	-3.09448	3.7584e-48	antiholin-like protein LrgB
SAOUHSC_00232	65.7943	313.129	-2.63897	3.45391e-13	murein hydrolase regulator LrgA
SAOUHSC_00052	0.231084	0.935738	-2.28989	0.0119776	hypothetical protein
SAOUHSC_00061	197.868	718.918	-2.23746	2.82549e-51	myosin-cross-reactive antigen
SAOUHSC_00608	506.575	1555	-1.99297	1.81461e-41
SAOUHSC_01422	0.681851	1.92848	-1.81638	0.00214692
SAOUHSC_02967	422.857	1135.59	-1.80277	8.73656e-40
SAOUHSC_02964	516.137	1370.21	-1.7868	2.15637e-38
SAOUHSC_02965	402.423	1067.24	-1.78327	9.80253e-39
SAOUHSC_02046	0.523994	1.46632	-1.75342	0.00636021
SAOUHSC_02968	124.832	316.425	-1.71894	1.03137e-43
SAOUHSC_01230	0.535396	1.37029	-1.67006	0.0188977
SAOUHSC_A00635	0.388941	1.00415	-1.63067	0.0456806
SAOUHSC_02681	52.1715	121.259	-1.59476	2.77892e-20
SAOUHSC_02942	730.975	1685.94	-1.577	2.78683e-24
SAOUHSC_02930	170.724	387.975	-1.55549	7.82057e-27
SAOUHSC_02764	0.58582	1.41589	-1.51201	0.0464844
SAOUHSC_00917	0.839707	1.80965	-1.47647	0.0123552
SAOUHSC_00292	3.70216	7.71394	-1.41567	2.03629e-06
SAOUHSC_02908	199.92	408.774	-1.40637	3.03919e-28
SAOUHSC_02036	2.28322	4.69844	-1.40206	0.00230491
SAOUHSC_02969	85.6638	172.557	-1.38768	2.23952e-35
SAOUHSC_03035	805.805	1624.52	-1.38557	3.10302e-24
SAOUHSC_01819	4027.94	7999.4	-1.36606	1.10297e-17
SAOUHSC_02556	77.3215	153.384	-1.36195	7.44231e-32
SAOUHSC_02044	1.18304	2.48187	-1.35531	0.0198744
SAOUHSC_00720	8.80223	17.4998	-1.34487	7.76867e-09
SAOUHSC_01386	2.86246	5.71881	-1.32894	0.000128449
SAOUHSC_02650	1232.9	2388.71	-1.32719	1.13277e-19
SAOUHSC_00008	182.734	351.923	-1.32215	2.88179e-26
SAOUHSC_02862	2124.25	4077.38	-1.31556	4.64623e-20
SAOUHSC_02047	3.64034	6.94746	-1.28752	1.97617e-05
SAOUHSC_02023	2.58095	4.94575	-1.28657	0.000535244
SAOUHSC_02721	20.4122	37.58	-1.27289	3.97575e-06
SAOUHSC_02671	27.8244	52.0647	-1.26958	1.68916e-14
SAOUHSC_02877	322.671	582.808	-1.22624	9.6823e-20
SAOUHSC_02021	3.18957	5.79204	-1.20368	0.0011718
SAOUHSC_02985	967.201	1707.57	-1.19313	1.07468e-17
SAOUHSC_02607	34.1338	59.4318	-1.17771	1.89009e-17
SAOUHSC_02722	36.1337	62.8038	-1.17381	2.77666e-19
SAOUHSC_00690	643.474	1119.84	-1.17337	1.6555e-18
SAOUHSC_02751	893.021	1541.52	-1.16175	8.55874e-17
SAOUHSC_02157	1.99513	3.44522	-1.16173	0.00672484
SAOUHSC_02996	0.912935	1.63557	-1.1597	0.0475003
SAOUHSC_02850	1263.24	2155.78	-1.1488	1.74344e-16
SAOUHSC_00009	3142.23	5357.29	-1.14861	7.36362e-14
SAOUHSC_02661	26.2164	44.8682	-1.1407	5.21477e-08
SAOUHSC_02470	6.52078	11.2065	-1.13726	4.15663e-05
SAOUHSC_00057	45.0127	75.9551	-1.13222	1.89328e-16
SAOUHSC_02685	3.2742	5.66839	-1.13092	0.0019665
SAOUHSC_02984	712.981	1201.75	-1.12728	2.53687e-17
SAOUHSC_02400	24.6348	41.237	-1.12348	1.42086e-13
SAOUHSC_02555	33.865	56.9776	-1.12315	2.41235e-18
SAOUHSC_00371	3574.65	5954.33	-1.11222	1.36344e-14
SAOUHSC_02680	28.64	47.1479	-1.10113	1.26079e-05
SAOUHSC_00065	115.948	191.934	-1.09642	1.19716e-17
SAOUHSC_02387	211.456	347.151	-1.09285	2.51707e-18
SAOUHSC_02879	158.706	259.857	-1.08496	1.65982e-19
Novel00011	163.778	263.494	-1.08443	0.00120851
SAOUHSC_01855	2409.27	3881.48	-1.07242	3.56718e-08
SAOUHSC_02849	3176.41	5113.44	-1.06256	1.21368e-13
SAOUHSC_00069	19.704	31.8082	-1.05641	6.67551e-06
SAOUHSC_01278	123.239	197.206	-1.05403	1.39052e-17
SAOUHSC_02941	360.49	573.085	-1.0511	2.04802e-10
SAOUHSC_01256	18.6284	29.5083	-1.04943	5.3194e-10
SAOUHSC_00767	4277.2	6762.99	-1.0383	4.09813e-12
SAOUHSC_01133	42.5309	67.237	-1.03545	2.5254e-15
SAOUHSC_02983	887.725	1399.05	-1.0323	5.15334e-15
SAOUHSC_01049	292.07	460.062	-1.03043	8.01806e-15
SAOUHSC_01127	1.67941	2.70155	-1.02229	0.0205079
SAOUHSC_00687	37.9105	59.1323	-1.01301	4.88245e-12
SAOUHSC_01129	19.6974	30.4668	-1.00848	1.57964e-10
SAOUHSC_01450	14.2408	22.242	-1.0083	3.86025e-05
SAOUHSC_03048	3.37023	5.29566	-1.0081	0.00454593
SAOUHSC_02781	1184.02	1832.02	-1.00704	7.9799e-08
SAOUHSC_00712	232.309	358.188	-0.997382	1.9926e-13
SAOUHSC_02610	1245.24	1917.11	-0.99485	1.04147e-12
SAOUHSC_00617	3446.4	5252.94	-0.989514	1.75774e-07
SAOUHSC_00187	3991.66	6088.42	-0.982491	5.25041e-11
SAOUHSC_02401	242.033	368.011	-0.981334	1.84688e-14
SAOUHSC_01181	1015.59	1518.82	-0.980034	0.00209732
SAOUHSC_00699	331.611	504.561	-0.978861	1.13429e-13
SAOUHSC_00133	99.6854	150.808	-0.974348	5.20379e-16
SAOUHSC_01254	10.2799	15.5923	-0.973527	1.30458e-06
SAOUHSC_03032	26.1252	39.8997	-0.971969	1.14718e-08
SAOUHSC_02754	119.161	180.215	-0.96725	4.8127e-10
SAOUHSC_00854	603.529	906.783	-0.957941	2.68593e-10
SAOUHSC_02022	5.98538	9.02898	-0.955843	0.000214599
SAOUHSC_00058	71.3216	106.666	-0.953807	1.89242e-15
SAOUHSC_00094	619.988	924.103	-0.951461	8.74337e-11
SAOUHSC_01257	9.79498	14.6908	-0.949649	1.55358e-05
SAOUHSC_02880	341.611	507.043	-0.947103	2.81282e-12
SAOUHSC_00708	54.2196	80.5838	-0.937714	3.55375e-08
sRNA00028	246.786	362.55	-0.928148	3.30921e-13
SAOUHSC_01969	1925.36	2821.65	-0.927812	4.52939e-11
SAOUHSC_02753	200.48	293.233	-0.925047	2.97897e-14
SAOUHSC_00821	41.6114	60.7271	-0.923896	1.71237e-09
SAOUHSC_00203	2.76161	4.01483	-0.915344	0.0125992
SAOUHSC_02434	249.157	362.385	-0.913759	1.2661e-12
SAOUHSC_02217	2.41827	3.46803	-0.90846	0.022497
SAOUHSC_02441	18928.8	27394.5	-0.907461	7.15777e-10
SAOUHSC_00812	7424.64	10686.8	-0.901356	3.1704e-09
SAOUHSC_00826	3716.6	5346.44	-0.900031	5.99117e-10
SAOUHSC_02821	30.4281	43.7093	-0.895826	8.87294e-09
SAOUHSC_00985	376.775	534.42	-0.891894	1.22991e-05
SAOUHSC_02679	6.013	8.58785	-0.889063	0.00493215
SAOUHSC_02442	2049.14	2931.21	-0.88845	7.82844e-10
SAOUHSC_02606	62.9149	89.6513	-0.886588	1.55625e-14
SAOUHSC_00188	1962.63	2795.69	-0.885671	3.19546e-09
SAOUHSC_02138	66.3308	94.1884	-0.884765	2.72251e-13
SAOUHSC_02182	32.4394	45.9241	-0.878072	1.48917e-08
SAOUHSC_00841	148.324	208.36	-0.870384	1.81271e-10
SAOUHSC_00820	34.1123	48.0872	-0.863063	1.0782e-07
SAOUHSC_02443	13226	18552.3	-0.861344	4.66956e-09
sRNA00003	1167.49	1632.66	-0.857768	1.88946e-10
SAOUHSC_01128	10.5843	14.8372	-0.856129	0.000112825
SAOUHSC_00086	1134.86	1575.64	-0.854082	1.52193e-07
SAOUHSC_00135	26.5045	36.7714	-0.849227	3.68439e-07
SAOUHSC_01378	3.05452	4.23451	-0.848827	0.0129405
SAOUHSC_01854	1092.34	1506.37	-0.840388	1.13181e-08
SAOUHSC_01015	8.84302	12.2659	-0.84021	0.000507752
SAOUHSC_01676	962.944	1327.47	-0.837563	2.87731e-10
SAOUHSC_00719	40.0832	55.3846	-0.837066	1.82502e-07
SAOUHSC_00966	8.87899	11.8164	-0.821922	0.0383911
SAOUHSC_00469	4814.75	6531.84	-0.819277	4.91061e-08
SAOUHSC_00855	494.358	673.066	-0.819	1.79169e-09
SAOUHSC_00183	18.8643	25.6075	-0.817909	4.91645e-07
SAOUHSC_00326	4.00647	5.49254	-0.81272	0.0178048
SAOUHSC_02900	698.749	946.878	-0.811598	5.88844e-10
SAOUHSC_00039	62.7391	84.8705	-0.801929	3.10292e-09
SAOUHSC_00019	9.17014	12.3962	-0.79992	0.00171651
SAOUHSC_00358	12888.8	17177.8	-0.796908	2.42567e-06
SAOUHSC_02029	3.40925	4.66424	-0.795212	0.0476271
SAOUHSC_01869	1116.55	1494.41	-0.795009	1.43986e-08
SAOUHSC_02145	1550.39	2079.1	-0.794817	3.31038e-08
SAOUHSC_01170	67.8392	90.3915	-0.794088	2.15802e-10
SAOUHSC_00209	17.9724	23.8855	-0.791704	2.91235e-05
SAOUHSC_01815	860.05	1142.26	-0.786391	7.48123e-09
SAOUHSC_02882	146.65	195.265	-0.782705	7.59944e-11
SAOUHSC_01016	3.821	5.03519	-0.778436	0.0184775
SAOUHSC_01997	5215.92	6869.92	-0.778001	0.000205997
SAOUHSC_02402	91.3281	121.271	-0.777223	1.37784e-11
SAOUHSC_02994	1006.32	1328.79	-0.777014	3.87569e-08
SAOUHSC_00840	137.463	181.546	-0.773429	3.9886e-11
SAOUHSC_00688	334.275	437.983	-0.768293	4.9362e-08
SAOUHSC_01169	12.9113	17.106	-0.763375	0.0062816
SAOUHSC_02820	26.6623	35.014	-0.763053	6.33009e-07
SAOUHSC_02684	27.4144	35.8603	-0.76213	3.87388e-07
SAOUHSC_01287	1178.54	1535.58	-0.759784	1.99576e-08
SAOUHSC_00619	837.552	1090.01	-0.758474	1.1378e-07
SAOUHSC_00698	164.066	214.003	-0.754616	3.02709e-10
SAOUHSC_00898	226.546	295.925	-0.754324	5.03358e-08
SAOUHSC_02682	21.7675	28.4182	-0.752597	4.0749e-05
SAOUHSC_00707	11.1749	14.6697	-0.74822	0.0324865
SAOUHSC_02824	16.9748	21.975	-0.747762	1.85123e-05
SAOUHSC_02774	2729.08	3513.58	-0.744655	2.46337e-05
SAOUHSC_02675	125.296	162.07	-0.741201	3.11555e-11
SAOUHSC_02376	423.392	544.095	-0.738218	2.11567e-08
SAOUHSC_01031	29.8471	38.5684	-0.736075	1.01537e-06
SAOUHSC_01987	2207.78	2826.57	-0.728951	7.65802e-07
SAOUHSC_02286	282.337	362.565	-0.727663	1.88162e-06
SAOUHSC_00291	4.6493	5.95471	-0.727119	0.0189137
SAOUHSC_02881	538.496	686.162	-0.72656	2.04939e-07
SAOUHSC_01677	747.823	953.912	-0.725866	4.37819e-08
SAOUHSC_01385	5.04964	6.50809	-0.725744	0.0208833
SAOUHSC_00918	83.1801	105.483	-0.720625	5.37663e-11
Novel00012	156.413	196.904	-0.715366	4.1292e-06
SAOUHSC_01012	3.70875	4.64625	-0.715296	0.0226928
SAOUHSC_02363	2560.3	3242.5	-0.71409	8.69599e-07
SAOUHSC_00789	1508.84	1907.82	-0.713037	1.43603e-07
SAOUHSC_00689	62.0945	78.8618	-0.712359	1.22416e-08
SAOUHSC_01858	67.862	85.7343	-0.709432	1.55646e-08
SAOUHSC_02982	1191.19	1503.62	-0.709052	7.34831e-07
SAOUHSC_02582	6535.38	8234.96	-0.707469	1.32466e-06
SAOUHSC_01043	1615.11	2028.37	-0.705879	4.95505e-07
SAOUHSC_00912	726.323	911.675	-0.702341	1.74671e-07
SAOUHSC_02929	619.213	774.003	-0.694678	3.00392e-06
SAOUHSC_02320	769.999	957.172	-0.692685	4.24326e-05
SAOUHSC_02288	96.4743	120.268	-0.692412	1.44503e-09
SAOUHSC_02403	456.479	567.154	-0.687603	3.89961e-08
SAOUHSC_02677	82.7552	103.104	-0.687342	7.17082e-10
SAOUHSC_00293	12.703	15.641	-0.686918	0.00226509
SAOUHSC_00656	62.6334	77.5367	-0.685681	3.37001e-08
SAOUHSC_02382	68.0571	84.6491	-0.681457	9.60649e-08
SAOUHSC_00242	35.9189	44.3539	-0.676121	9.30122e-05
SAOUHSC_00851	1771.23	2178	-0.674368	7.339e-07
SAOUHSC_00003	57.8845	71.2956	-0.673658	4.20138e-07
SAOUHSC_02287	372.354	459.156	-0.670419	7.81568e-07
SAOUHSC_00037	508.519	620.848	-0.663255	2.058e-07
SAOUHSC_00748	7.6762	9.31531	-0.660556	0.00440148
SAOUHSC_02604	3385.92	4120.99	-0.660324	6.01348e-06
SAOUHSC_00554	417.858	507.476	-0.659902	1.2322e-06
SAOUHSC_01166	12.2343	14.9609	-0.657567	0.00850034
SAOUHSC_01057	5.39956	6.61553	-0.654926	0.0282704
SAOUHSC_02033	33.2875	40.4627	-0.654476	1.74888e-05
SAOUHSC_A02013	3.92843	4.78789	-0.654451	0.0397817
SAOUHSC_02899	193.545	233.682	-0.650797	1.76704e-08
SAOUHSC_00318	297.996	361.049	-0.649377	1.46881e-06
SAOUHSC_00788	1533.86	1855.95	-0.648676	1.93885e-06
SAOUHSC_00620	10876.9	13110.8	-0.646366	2.33874e-05
SAOUHSC_00814	7.82265	9.49115	-0.646286	0.00819917
SAOUHSC_02043	7.41091	8.97197	-0.645645	0.0226823
SAOUHSC_02285	687.316	833.497	-0.643037	0.00039703
SAOUHSC_01165	14.5793	17.6462	-0.642569	0.0449684
SAOUHSC_00488	199.201	239.258	-0.640152	4.56096e-08
SAOUHSC_01612	63.1298	75.8134	-0.63979	2.09818e-06
SAOUHSC_01447	747.957	903.797	-0.638762	2.22166e-05
SAOUHSC_01861	133.136	159.873	-0.636745	3.59188e-09
SAOUHSC_01042	659.46	788.2	-0.633651	1.32347e-06
SAOUHSC_02171	35.9513	43.0616	-0.632633	5.58858e-05
SAOUHSC_02772	497.632	594.537	-0.632268	1.00389e-06
SAOUHSC_00319	388.657	464.48	-0.631951	6.91691e-07
SAOUHSC_02925	146.899	175.587	-0.631378	2.54615e-09
SAOUHSC_02048	10.1677	12.1699	-0.631184	0.00634067
SAOUHSC_02321	5.1847	6.29981	-0.630579	0.0402994
SAOUHSC_02351	544.237	647.584	-0.629731	5.99731e-06
SAOUHSC_00850	262.313	313.512	-0.629699	3.87074e-07
SAOUHSC_02714	7.29384	8.70187	-0.629657	0.0162713
SAOUHSC_00792	1571.74	1872.3	-0.628567	7.98732e-06
SAOUHSC_00713	548.742	653.628	-0.628415	1.80034e-06
SAOUHSC_00577	42.5519	50.7528	-0.628346	9.66995e-06
Novel00009	176.429	208.721	-0.623131	0.00296819
SAOUHSC_01041	435.944	517.605	-0.621412	2.49182e-06
SAOUHSC_03046	29.3218	34.2812	-0.619226	0.0031422
SAOUHSC_01675	787.361	932.124	-0.618303	3.05801e-06
SAOUHSC_02841	28.2523	33.3034	-0.616258	0.00020338
SAOUHSC_02108	1327.95	1578.46	-0.615445	0.0063529
SAOUHSC_02676	248.294	292.821	-0.610725	1.05519e-06
SAOUHSC_01362	202.882	238.839	-0.608294	8.43951e-07
SAOUHSC_02542	95.6784	112.387	-0.604337	4.46158e-07
SAOUHSC_00113	120.7	141.615	-0.602627	3.67813e-07
SAOUHSC_01857	710.79	829.938	-0.597992	6.54287e-06
SAOUHSC_02922	148.154	173.453	-0.597362	8.44028e-07
SAOUHSC_02678	66.2444	77.4166	-0.596782	2.9113e-06
SAOUHSC_02581	1557.76	1811.9	-0.594003	1.1554e-05
SAOUHSC_01290	8.88686	10.3357	-0.592508	0.0143699
SAOUHSC_00284	25.9967	30.4607	-0.592086	0.0489533
SAOUHSC_01248	98.5242	115.017	-0.591879	2.0011e-06
SAOUHSC_01799	166.651	192.729	-0.585853	4.47038e-07
SAOUHSC_01040	851.419	986.249	-0.585543	8.67482e-06
